# Supplementary material
Source: PubMed Central journal article supplement (PMC2922263)
Supplement: 1008652107_pnas.201008652SI.pdf [file 1008652107_pnas.201008652SI.pdf]

# Supporting Information

Qin et al. 10.1073/pnas.1008652107

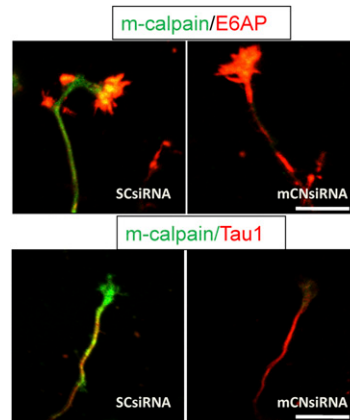

**Fig. S1.** siRNA suppresses m-calpain expression in axons and growth cones. Cultured hippocampal neurons were transfected on DIV 3 with siRNA against m-calpain (mCNsiRNA) or scrambled siRNA (SCsiRNA) and treated on DIV 4 with DMSO for 5 min before being fixed and processed for immunostaining with anti-m-calpain (green) and anti-E6AP (red) antibodies (*Upper*) or anti-m-calpain (green) and Tau1 (red, an axon marker) antibodies (*Lower*) as described in *Materials and Methods*. (Scale bar, 20  $\mu\text{m}$ .)

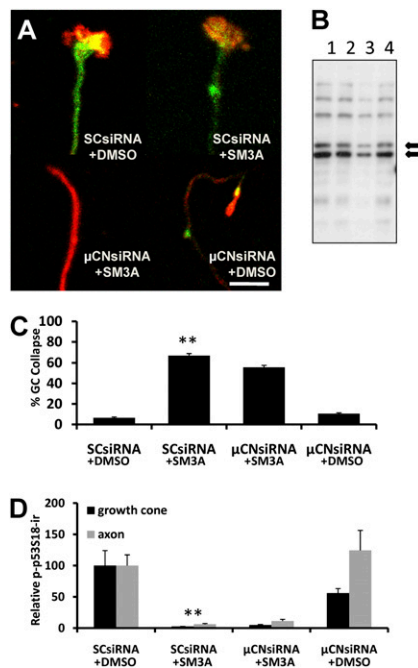

**Fig. S2.** Suppression of  $\mu$ -calpain with siRNA did not block semaphorin 3A-induced growth cone collapse. (A) Cultured hippocampal neurons were transfected on DIV 3 with siRNA against  $\mu$ -calpain ( $\mu\text{CNsiRNA}$ ) or scrambled siRNA (SCsiRNA) and treated on DIV 4 with DMSO or semaphorin 3A (SM3A) for 5 min before being fixed and processed for immunostaining with anti-p-p53 (green) and anti-E6AP (red) antibodies. Results are representatives of three or four culture dishes from three independent experiments. (Scale bar, 20  $\mu\text{m}$ .) (B) Immunoblotting analysis of m-calpain in cultured cortical neurons. Cortical neurons were transfected on DIV 3 without siRNA (lane 1), with scrambled siRNA (lane 2), or siRNA against  $\mu$ -calpain (lane 3) or m-calpain (lane 4) and processed on DIV 4 for immunoblotting with anti- $\mu$ -calpain. Arrows indicate that  $\mu$ -calpain was decreased only by siRNA against  $\mu$ -calpain. (C) Percentage of collapsed growth cones (GC) in hippocampal neurons in experiments shown in *Fig. S1A* ( $n = 100$  growth cones from three independent experiments; \*\* $P < 0.001$  vs. DMSO-treated). (D) Levels of p-p53S18-ir in axons and growth cones of hippocampal neurons in experiments shown in *Fig. S1A* (data are means  $\pm$  SEM percent of DMSO-treated neurons;  $n = 25$ –30 growth cones; \*\* $P < 0.01$  vs. DMSO group).
